# Supplementary material for: Visible light excitable fluorescence probe and its functionalized Merrifield polymer: selective sensing and removal of arsenate from real samples
Source: Royal Society of Chemistry journal article supplement (doi:10.1039/c3ra45362f), 2013-11-07
Supplement: c3ra45362f.pdf [file c3ra45362f.pdf]

## Electronic Supplementary Information (ESI)

### 1. Calculation of Quantum Yield

Fluorescence quantum yields ( $\Phi$ ) were estimated by integrating the area under the fluorescence curves using the equation<sup>1</sup>,

$$\phi_{\text{sample}} = \phi_{\text{ref}} \times \frac{\text{OD}_{\text{ref}} \times A_{\text{sample}} \times \epsilon_{\text{sample}}}{\text{OD}_{\text{sample}} \times A_{\text{ref}} \times \epsilon_{\text{ref}}}$$

where A was the area under the fluorescence spectral curve and OD was optical density of the compound at the excitation wavelength. Complex tris(2,2'-bipyridyl)ruthenium(II) ( $\Phi = 0.042$  in water)<sup>2</sup> has been used as quantum yield standard for measuring the quantum yields of **APC** and its arsenate assembly .

### 2. Calculation of detection limit

To determine the detection limit, fluorescence titration of **APC** with arsenate is carried out by adding aliquots of micro-molar concentration of arsenate. From the concentration at which there was a sharp change in the fluorescence intensity multiplied with the concentration of **APC** gave the detection limit.<sup>3</sup>

### 3. Equations used for calculating detection limit (DL)

$$\text{DL} = C_L \times C_T$$

$C_L$  = Conc. of **APC**;  $C_T$  = Conc. of arsenate at which fluorescence enhanced.

Thus;

$$\text{DL} = 1 \mu\text{M} \times 0.001 \mu\text{M} = 0.001 \mu\text{M} = 1 \times 10^{-9} \text{ M}$$

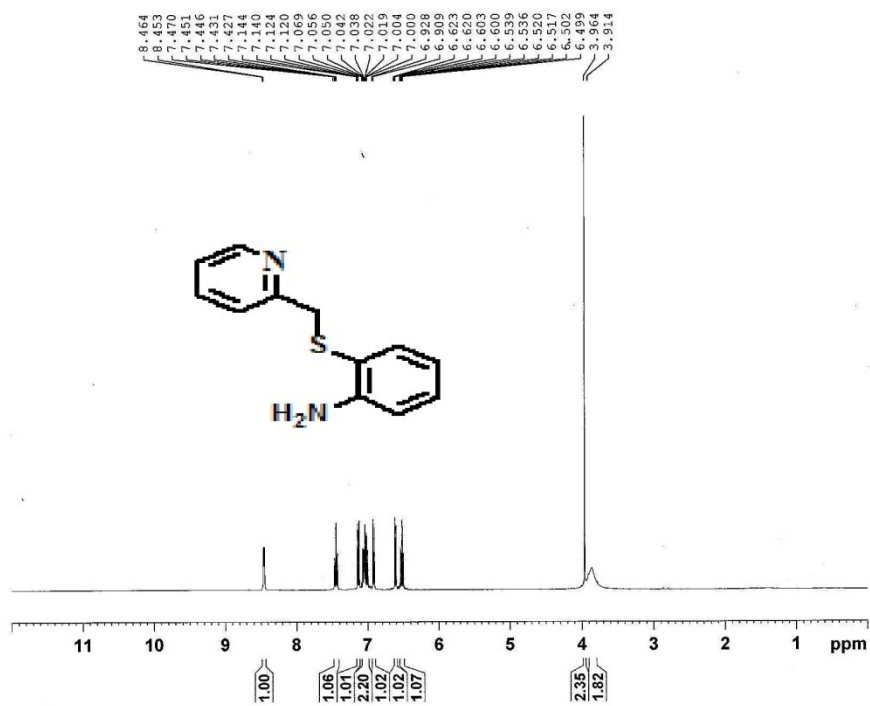

Figure S1. <sup>1</sup>H NMR spectrum of AP in CDCl<sub>3</sub>

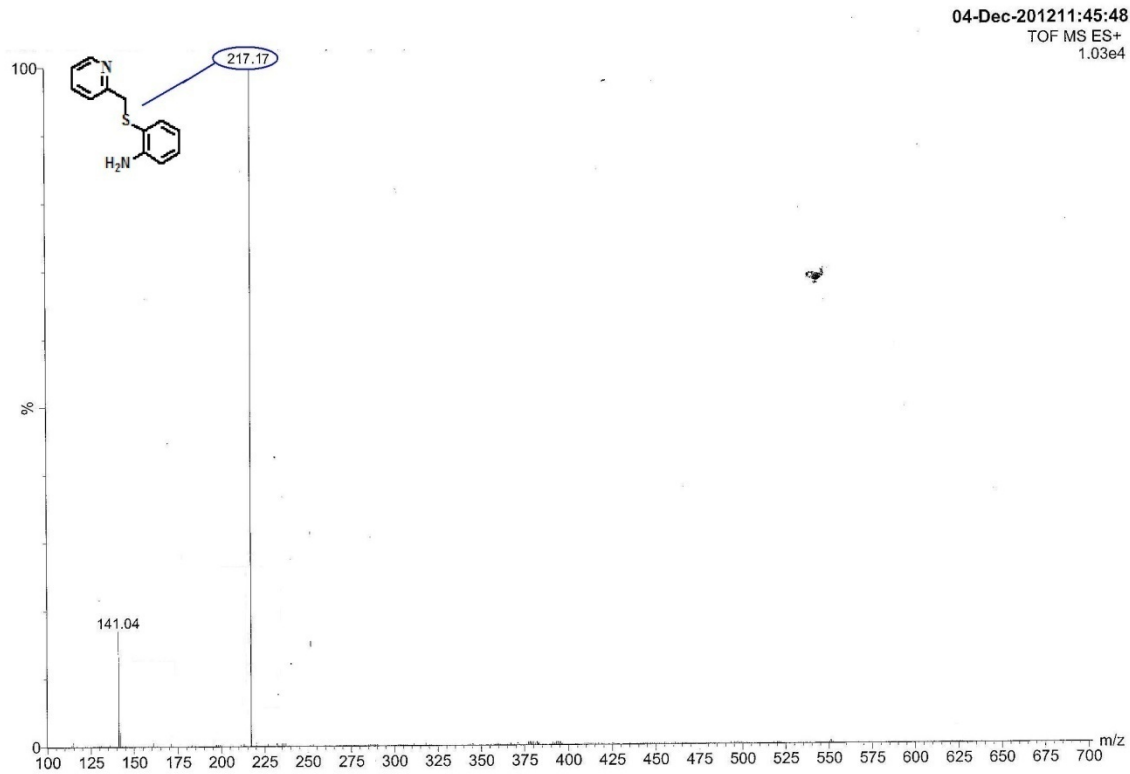

**Figure S2.** QTOF –MS ES<sup>+</sup> spectrum of **AP**

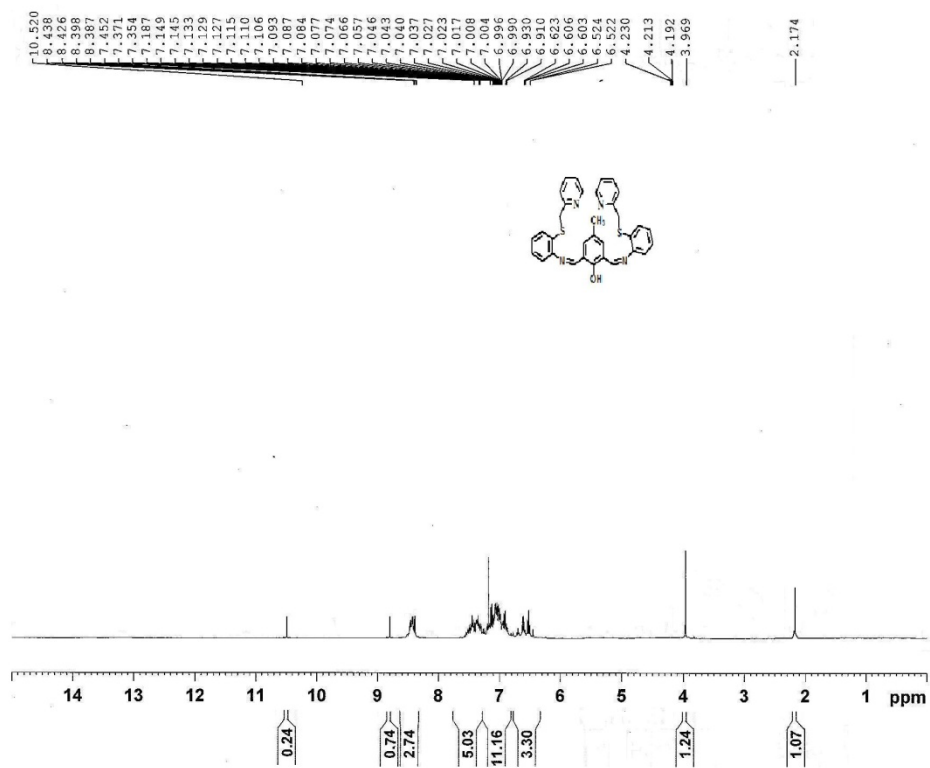

Figure S3. <sup>1</sup>H NMR spectrum of APC in CDCl<sub>3</sub>

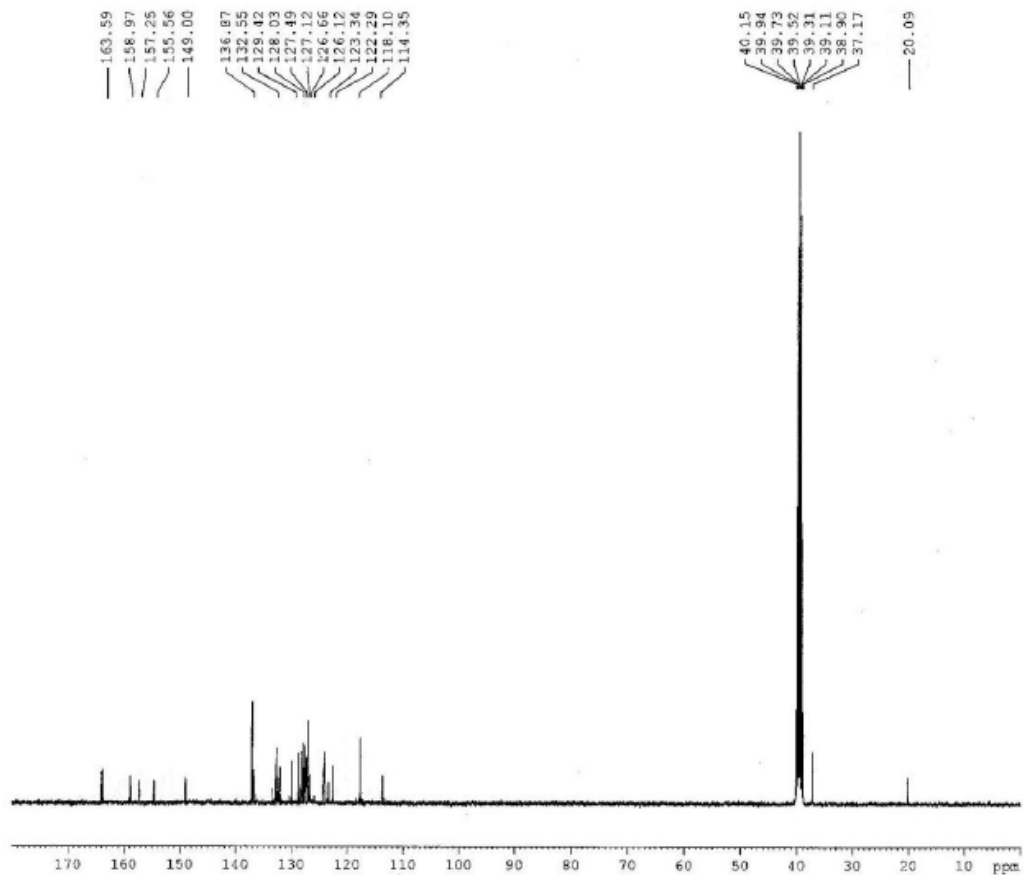

**Figure S4.**  $^{13}\text{C}$  NMR spectrum of APC in  $\text{DMSO-d}_6$

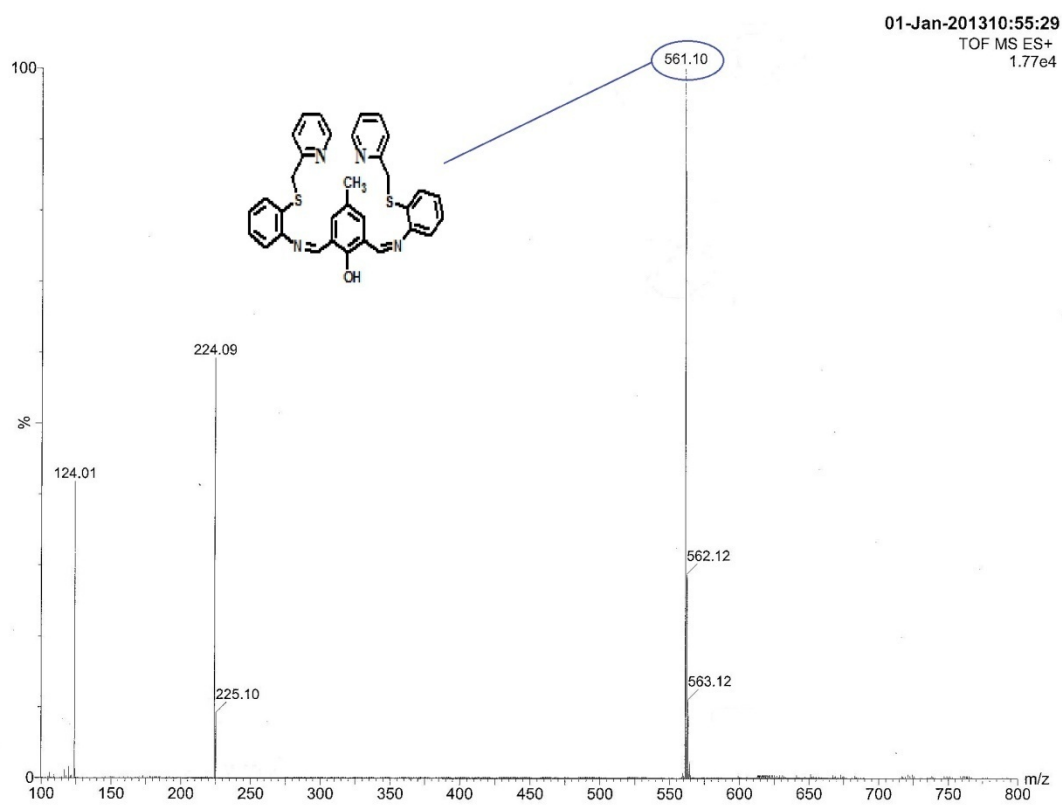

**Figure S5.** QTOF –MS ES<sup>+</sup> spectrum of APC

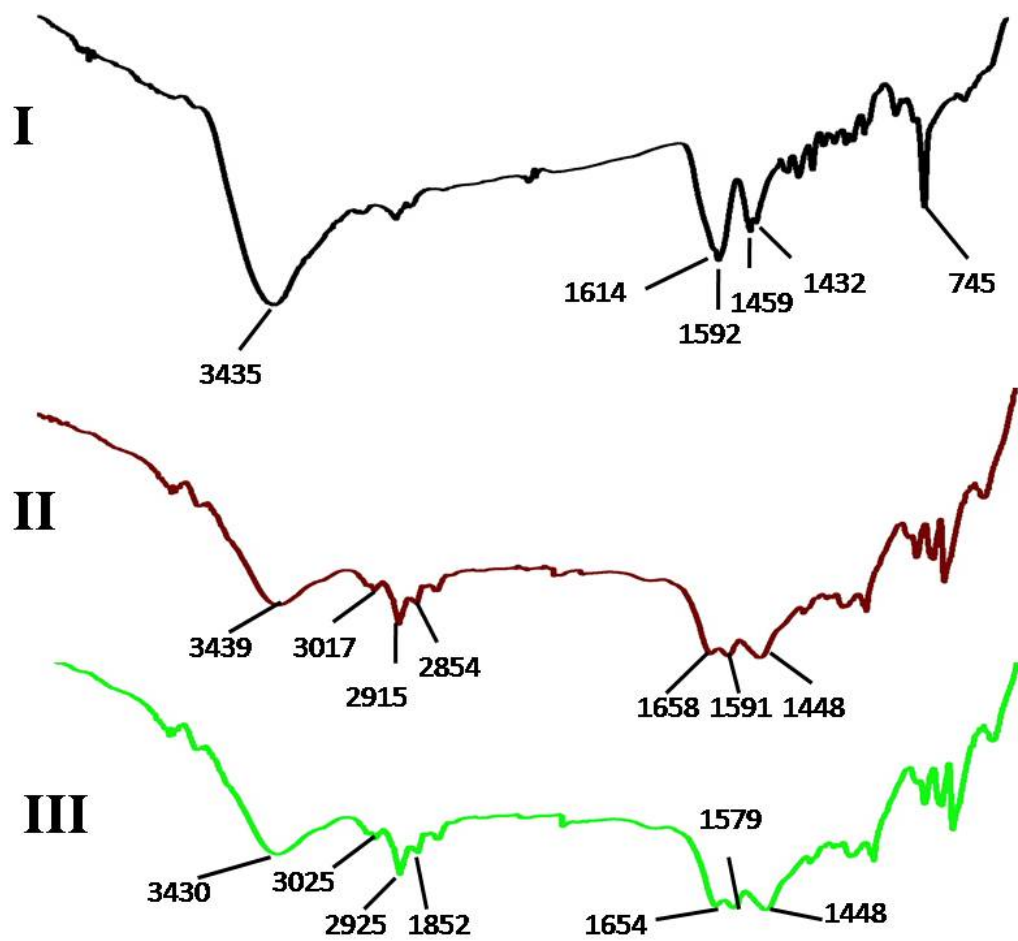

**Figure S6.** FTIR spectra of (I) APC, (II) APC- Merrifield polymer and (III) APC- Merrifield polymer + H<sub>2</sub>AsO<sub>4</sub><sup>-</sup>.

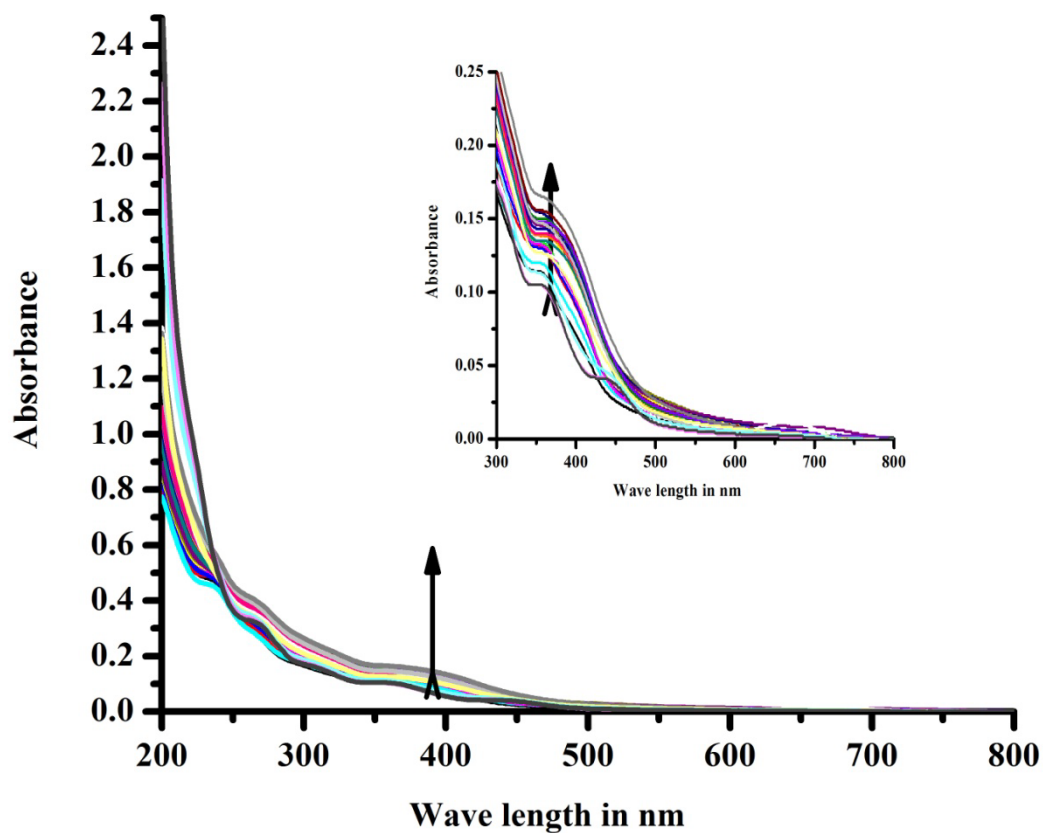

**Figure S7.** Changes in the absorbance of APC (10  $\mu\text{M}$ ) in HEPES buffered (0.1 M; EtOH– $\text{H}_2\text{O}$ , 1:99 v/v; pH 7.4) solution upon gradual addition of  $\text{H}_2\text{AsO}_4^-$  (0.010, 0.025, 0.050, 0.075, 0.100, 0.250, 0.500, 0.750 1.000, 5.000, 10.000, 20.000, 30.000, 40.000, 50.000, 60.000, 70.000, 80.000, 90.000, 100.000, 300.000, 500.000  $\mu\text{M}$ ).



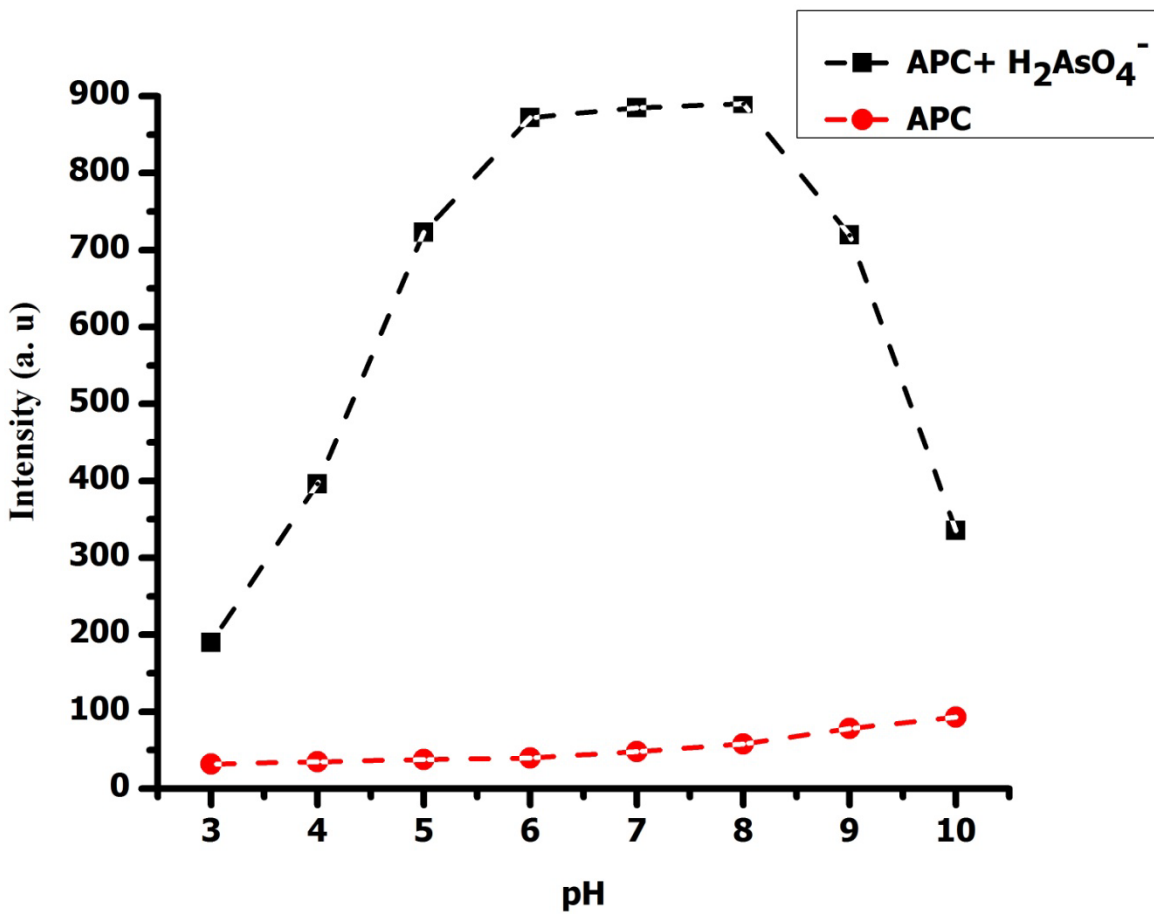

**Figure S8.** Influence of pH on the emission intensities of free APC (1 $\mu$ M) and its H<sub>2</sub>AsO<sub>4</sub><sup>-</sup> (5 $\mu$ M) adduct

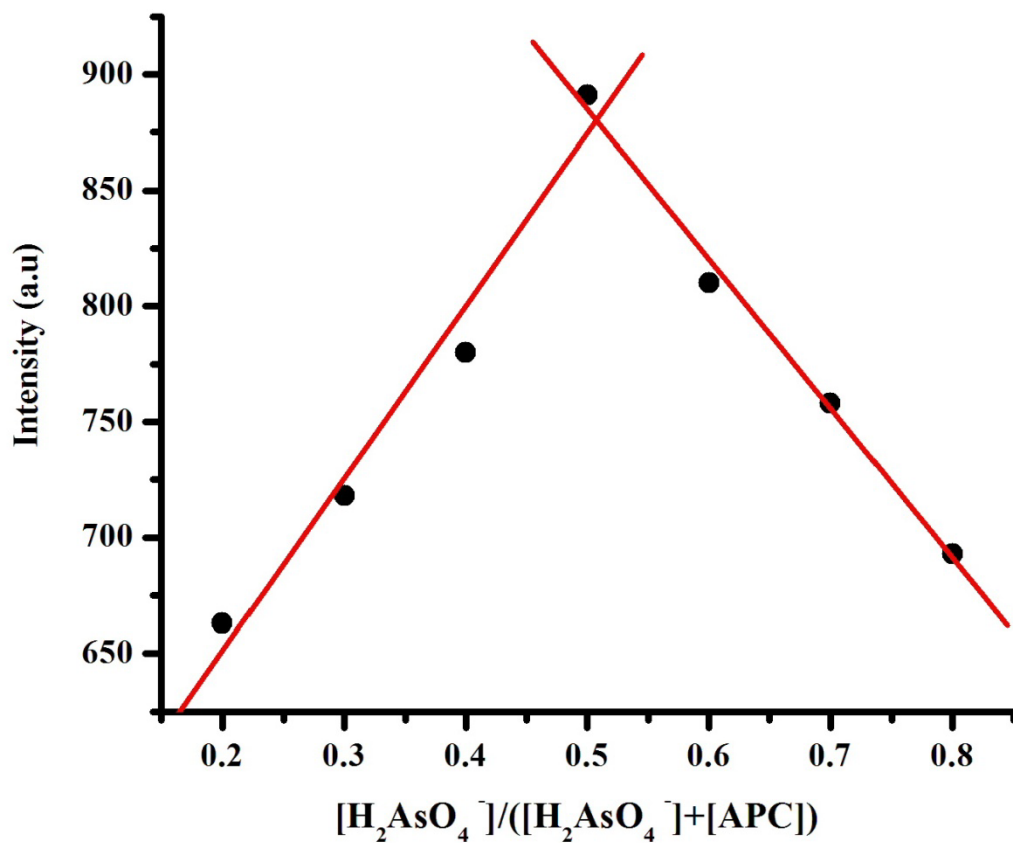

**Figure S9.** Job's plot for stoichiometry determination of APC-  $\text{H}_2\text{AsO}_4^-$  adduct,  $\lambda_{\text{ex}} = 440\text{nm}$ .

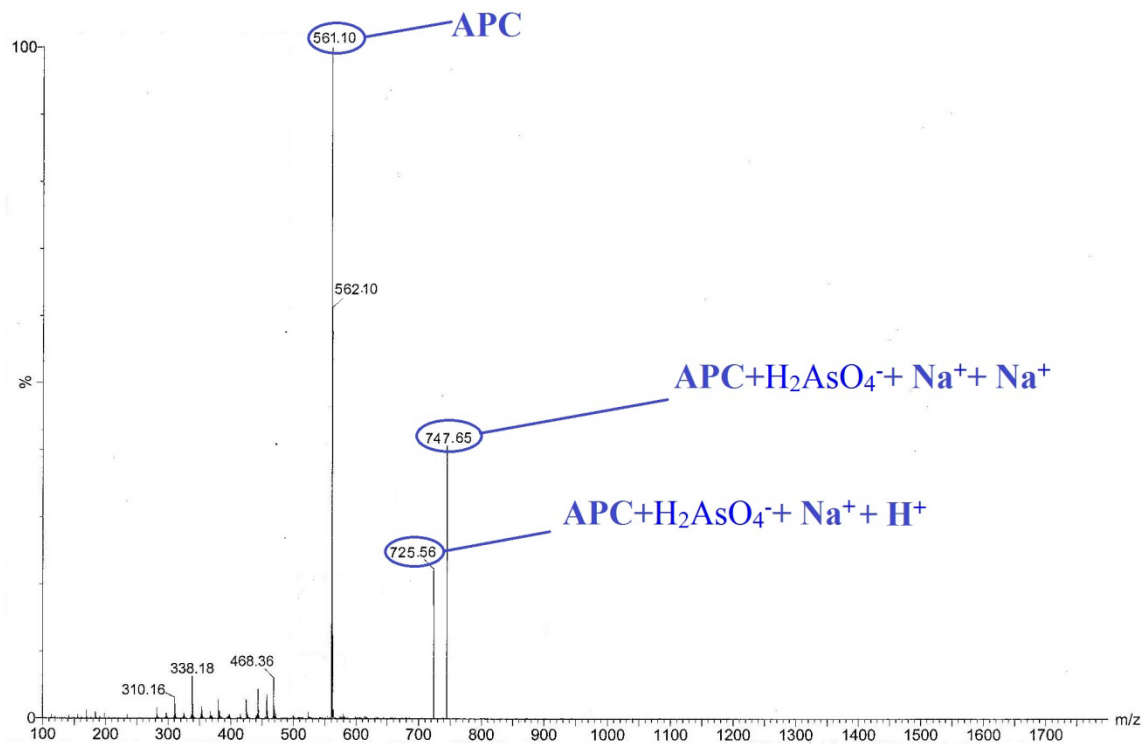

**Figure S10.** QTOF –MS ES<sup>+</sup> spectrum of APC- H<sub>2</sub>AsO<sub>4</sub><sup>-</sup> adduct

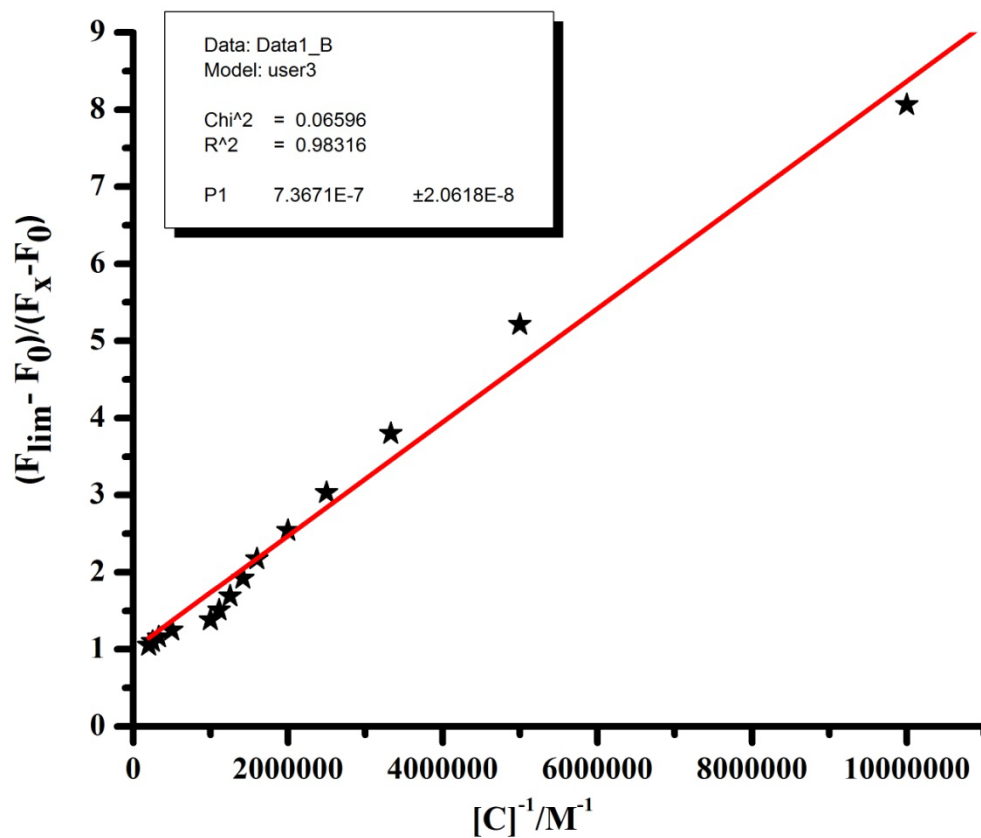

**Figure S11.** Estimation of binding constant of APC with  $H_2AsO_4^-$  by fluorescence method

## References

1. E. Austin, M. Gouterman, *Bioinorg. Chem.*, 1978, **9**, 281.
2. J. V. Houten, R. J. Watts, *J. Am. Chem. Soc.*, 1976, **98**, 4853.
3. G. L. Long, J. D. Winefordner, *Anal. Chem.*, 1983, **55**, 712A.
